# Supplementary material for: In vitro inhibition of hepatic stellate cell activation by the autophagy-related lipid droplet protein ATG2A
Source: PubMed Central journal article supplement (PMC6006255; doi:10.1038/s41598-018-27686-6), 2018-06-18
Supplement: 41598_2018_27686_MOESM1_ESM.pdf [file 41598_2018_27686_MOESM1_ESM.pdf]

**Supplementary Information file**

***In vitro* inhibition of hepatic stellate cell activation by the autophagy-related lipid droplet  
protein ATG2A**

Yun Hong\*, Sirui Li, Jifeng Wang, Youming Li\*

**\*: To whom correspondence should be addressed:**

**Yun Hong**

**E-mail: [yunhong@zju.edu.cn](mailto:yunhong@zju.edu.cn)**

**Youming Li**

**E-mail: [zlym@zju.edu.cn](mailto:zlym@zju.edu.cn)**

**Supplemental Figure 1:**

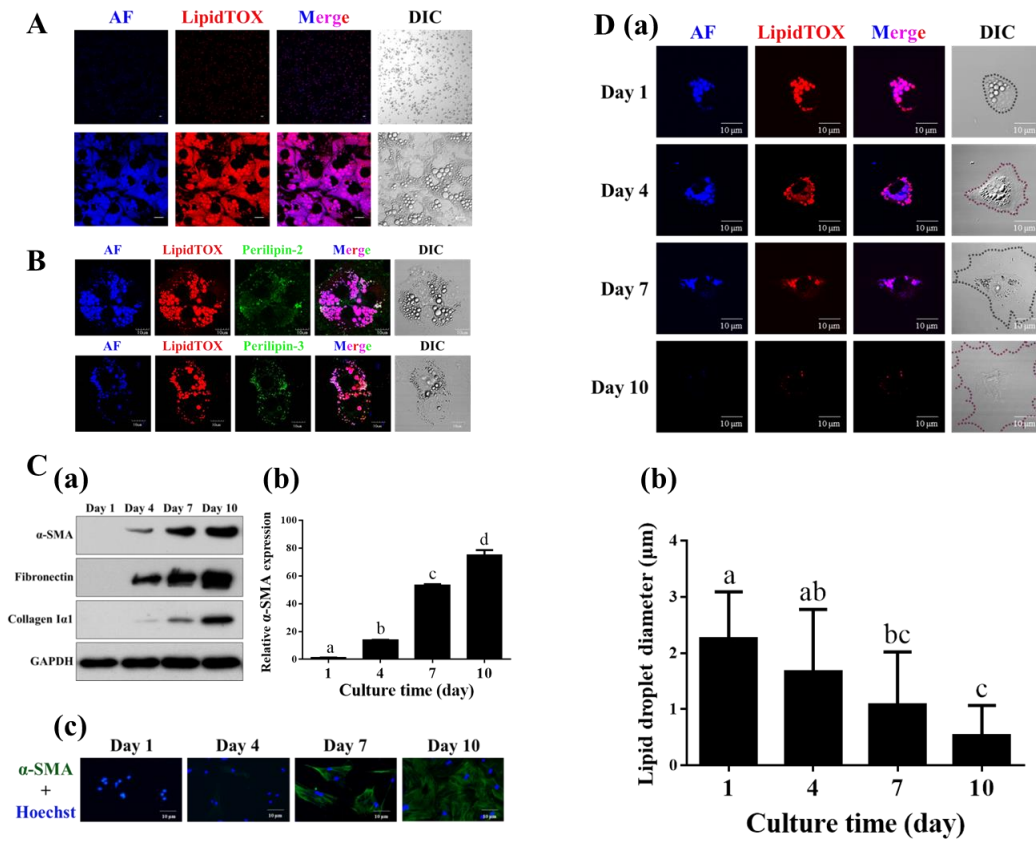

Supplemental Fig. 1. Stable, established model of *in vitro* primary mouse hepatic stellate cell (mHSC) activation. (A) Primary HSCs isolated from C57BL/6 mice. Intracellular LDs with retinoid content exhibited transient autofluorescence (AF, blue), whereas other neutral lipids (triacylglycerol, cholesterol esters, etc.) were stained by LipidTOX (red). (B) Immunofluorescence of LD scaffold proteins (perilipin-2 and perilipin-3). (C) Immunoblots for  $\alpha$ -SMA, fibronectin, and collagen I $\alpha$ 1 (a). Immunoblot quantification (b) and immunofluorescence (c) for  $\alpha$ -SMA. Full-length blots are presented in Supplemental Figure 8. (D) Dynamic morphology of primary HSCs cultured on dishes on days 1, 4, 7 and 10 (a). Quantification of LD diameter (b). Significant differences ( $p < 0.05$ ) are indicated by different letters.

Supplemental Figure 2:

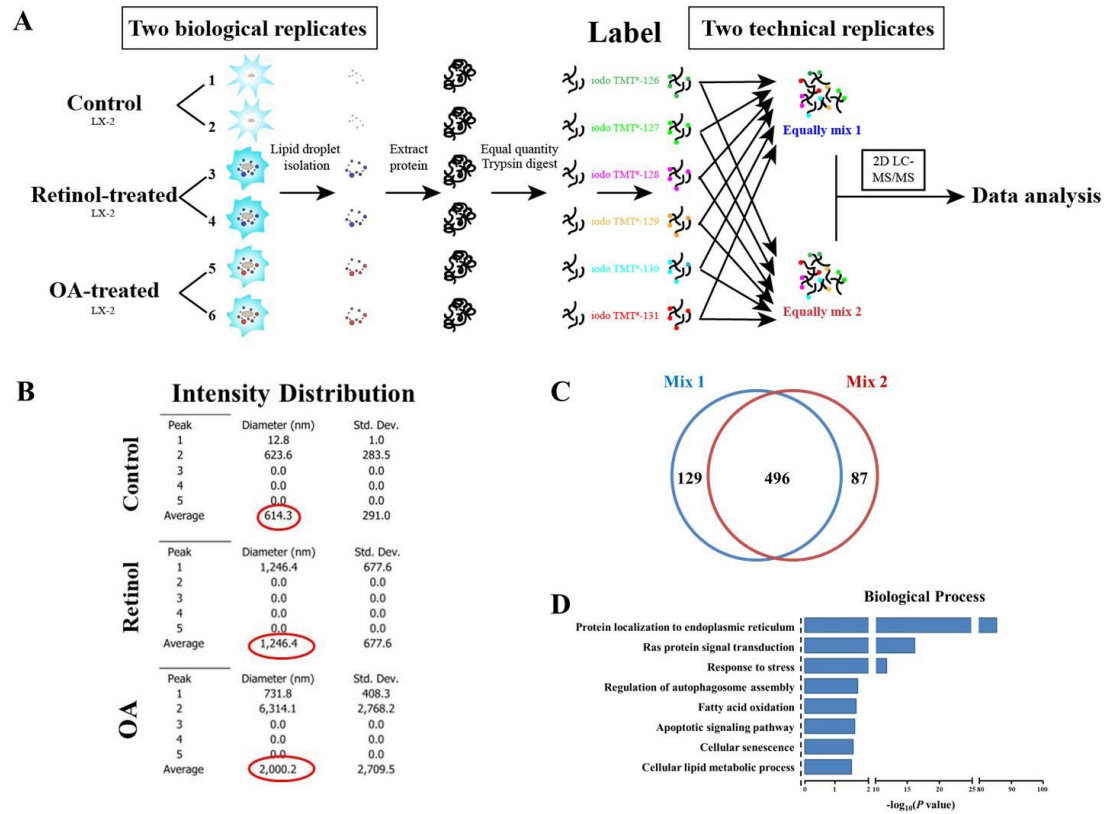

Supplemental Fig. 2. TMT-based quantitative proteomic analysis of isolated lipid droplets (LDs).

(A) Flow chart of experimental scheme. (B) Isolated LDs dimensioned by a Delsa Nano C particle analyzer. (C) Venn diagram of identified LD proteins based on two technical replicates (blue and red). (D) Biological processes associated with the 496 LD proteins based on the KEGG web database.

**Supplemental Figure 3:**

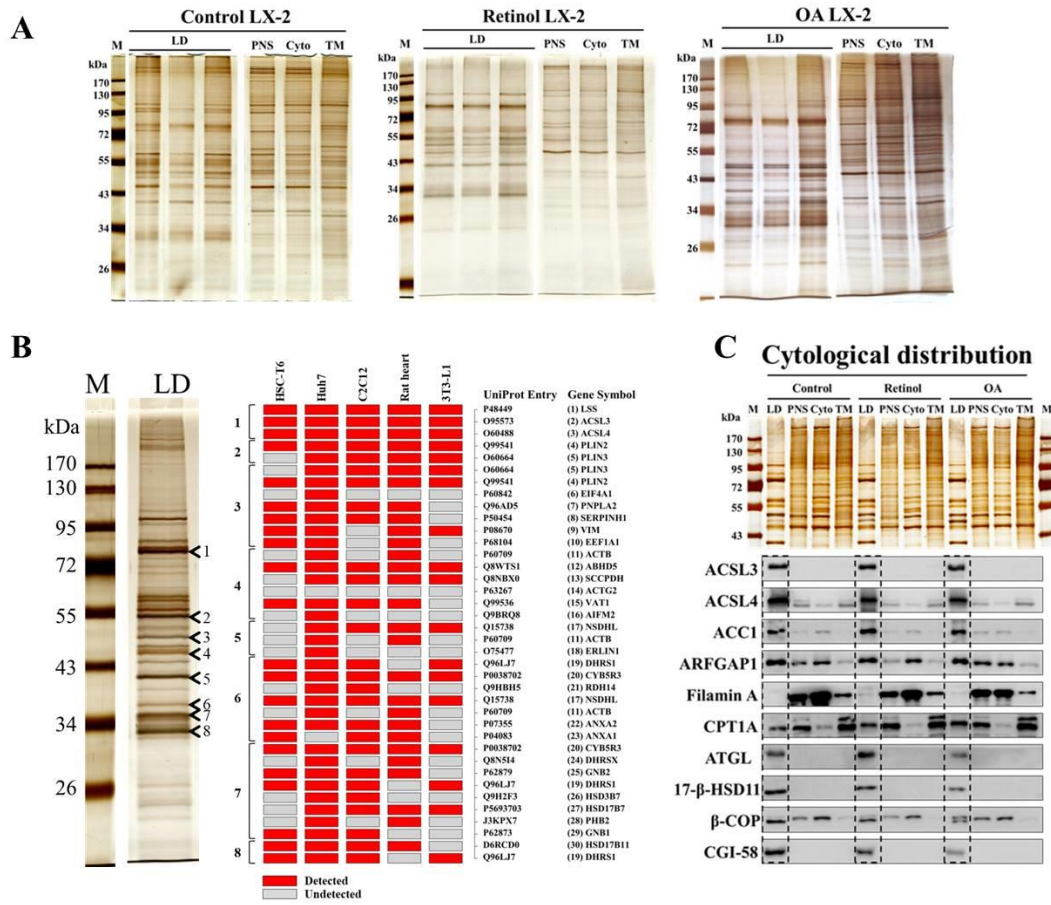

Supplemental Fig. 3. High quality isolation of lipid droplets (LDs) from LX-2 cells. (A) Silver stained gels with LD proteins purified in triplicate for each group. (B) Main bands with arrows from LD protein lane were excised for mass spectrometry analysis and compared with other published proteomes. (C) Immunoblots of some LD proteins identified by mass spectrometry. Full-length blots are presented in Supplemental Figure 9.

Supplemental Figure 4: Full western blot of Figure 1C

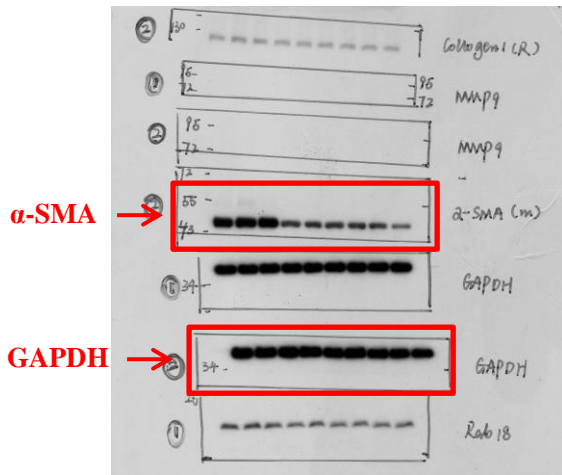

Exposure time 5 sec

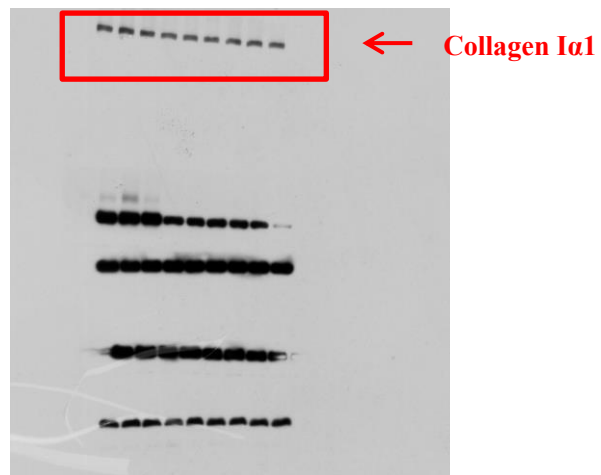

Exposure time 15 sec

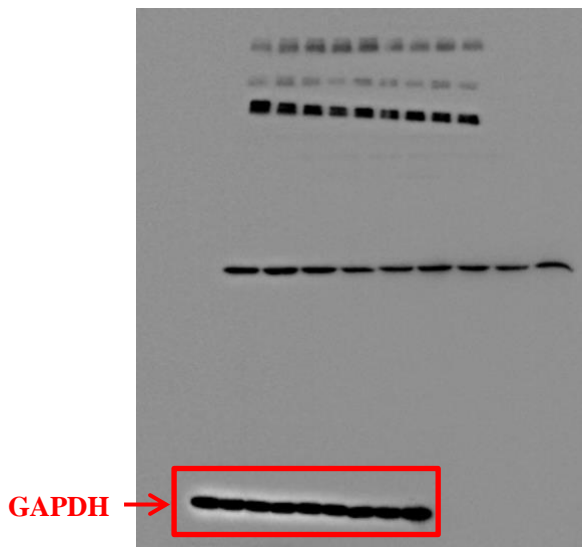

Exposure time 10 sec

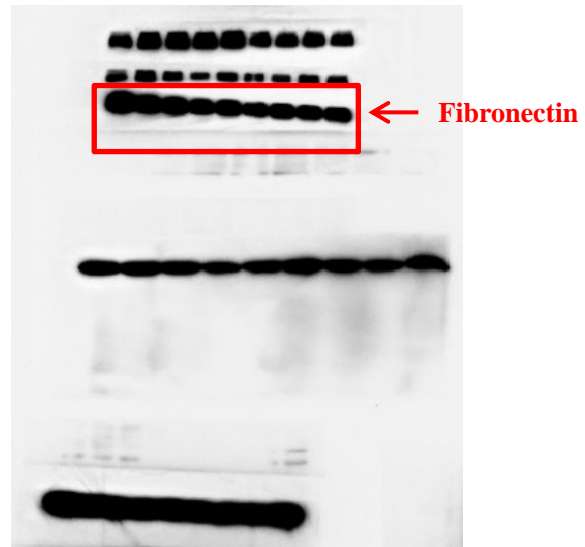

Exposure time 20 sec

**Supplemental Figure 5:** Full western blot of Figure 2E

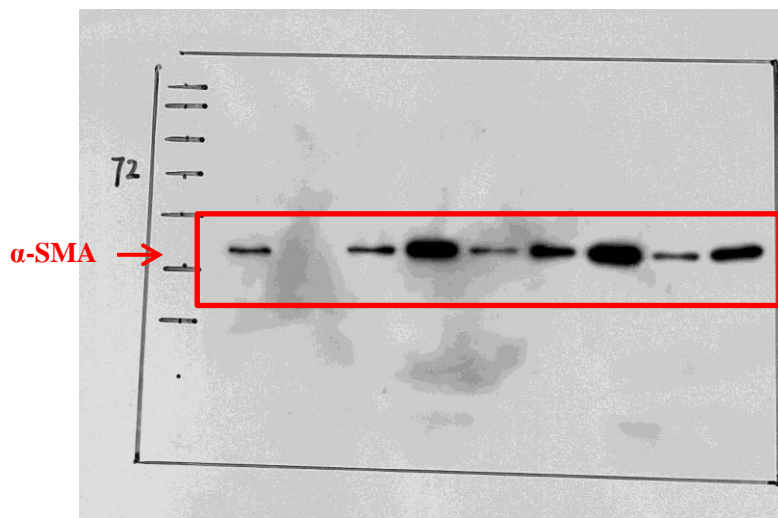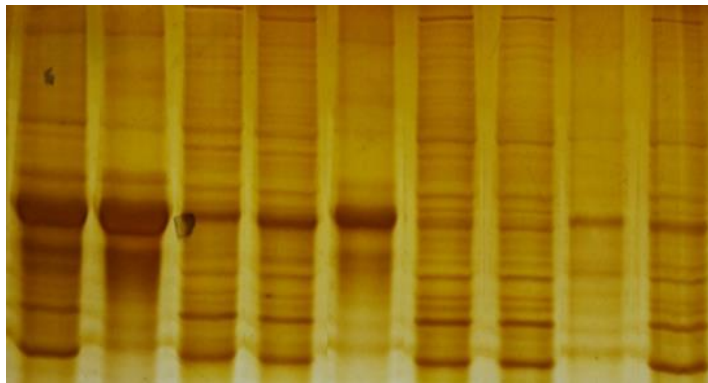

The gel for silver staining after transferring PVDF membrane

Supplemental Figure 6: Full western blot of Figure 3A

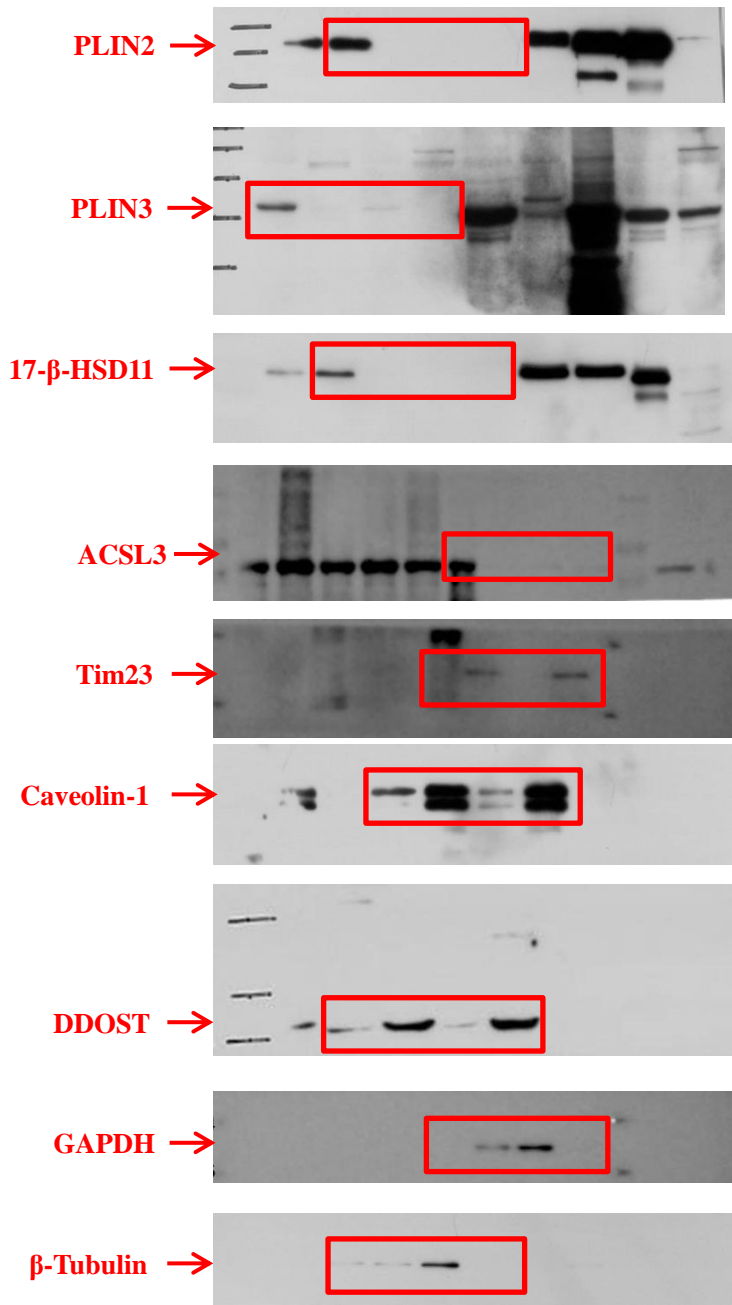

Full western blot of Figure 3F

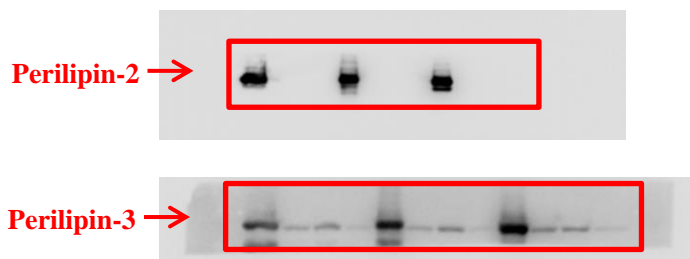

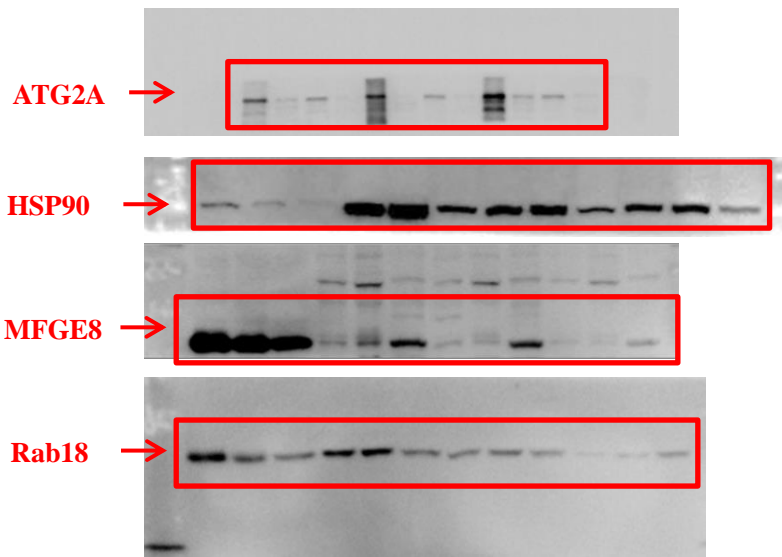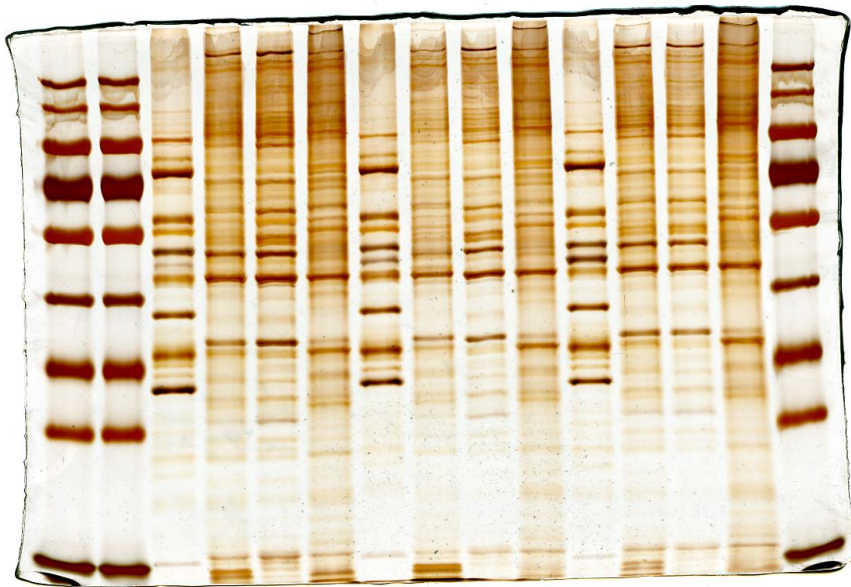



**Supplemental Figure 7: Full western blot of Figure 4C and D**

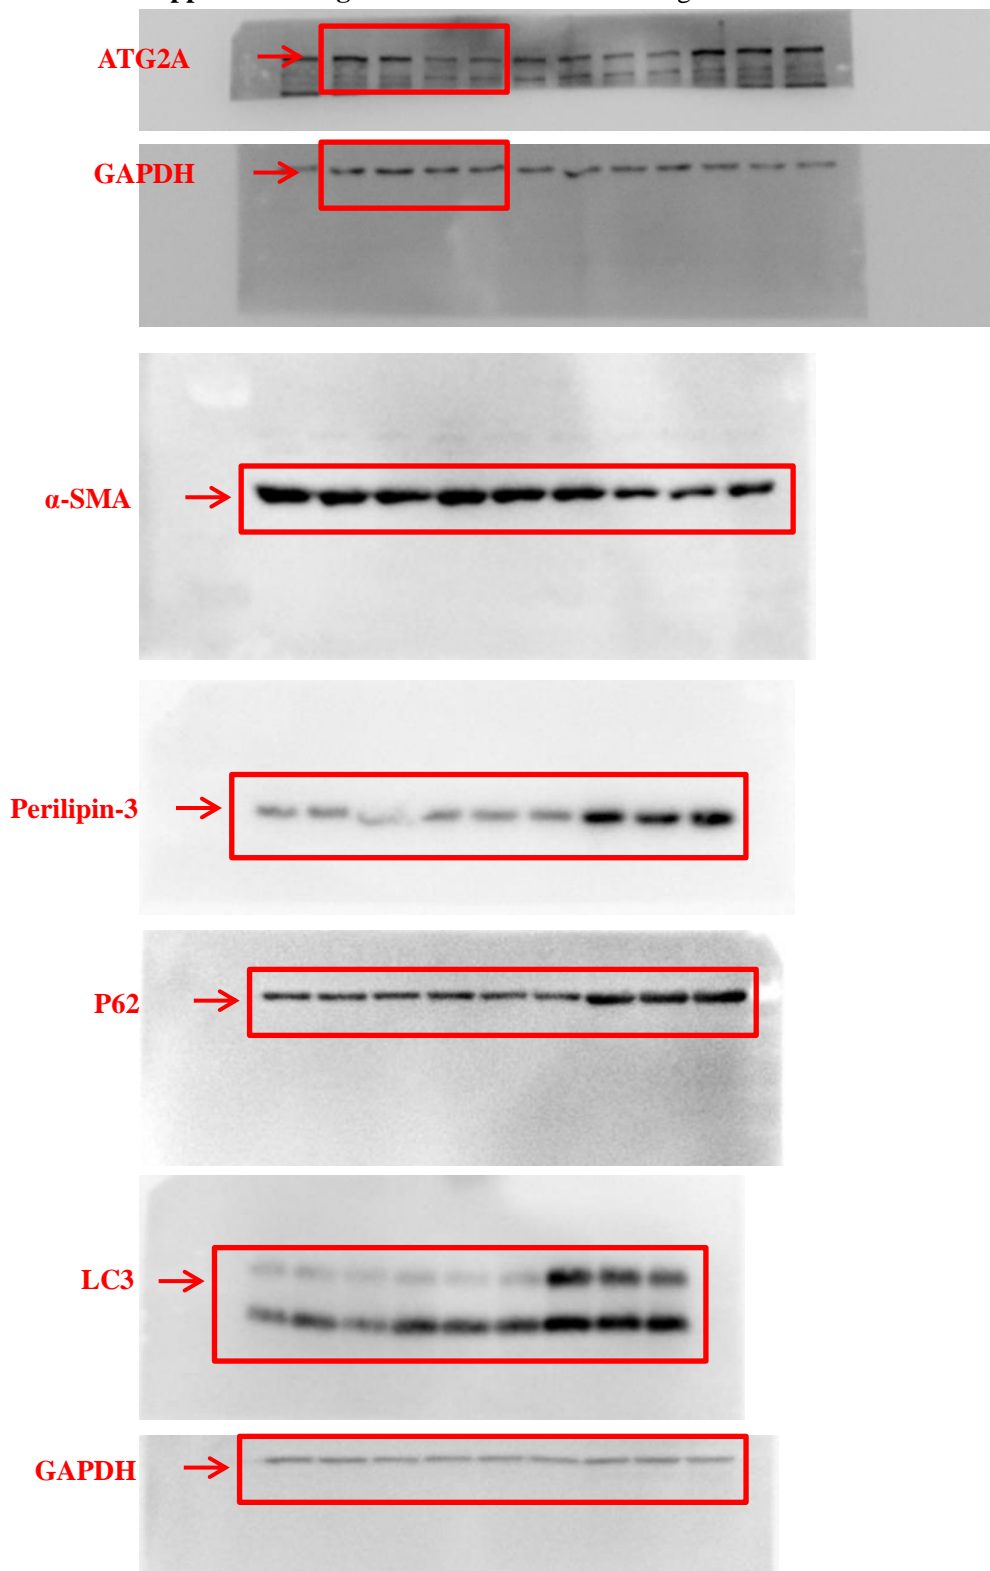

**Supplemental Figure 8:** Full western blot of Supplemental Figure 1C

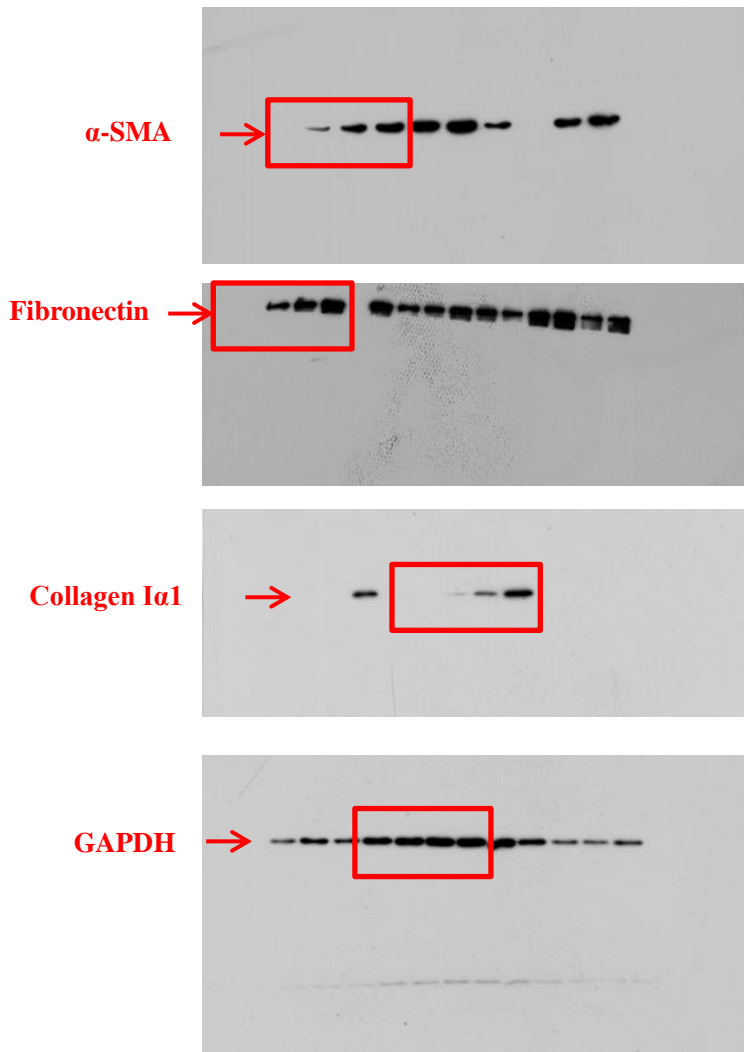

**Supplemental Figure 9:** Full western blot of Supplemental Figure 3C

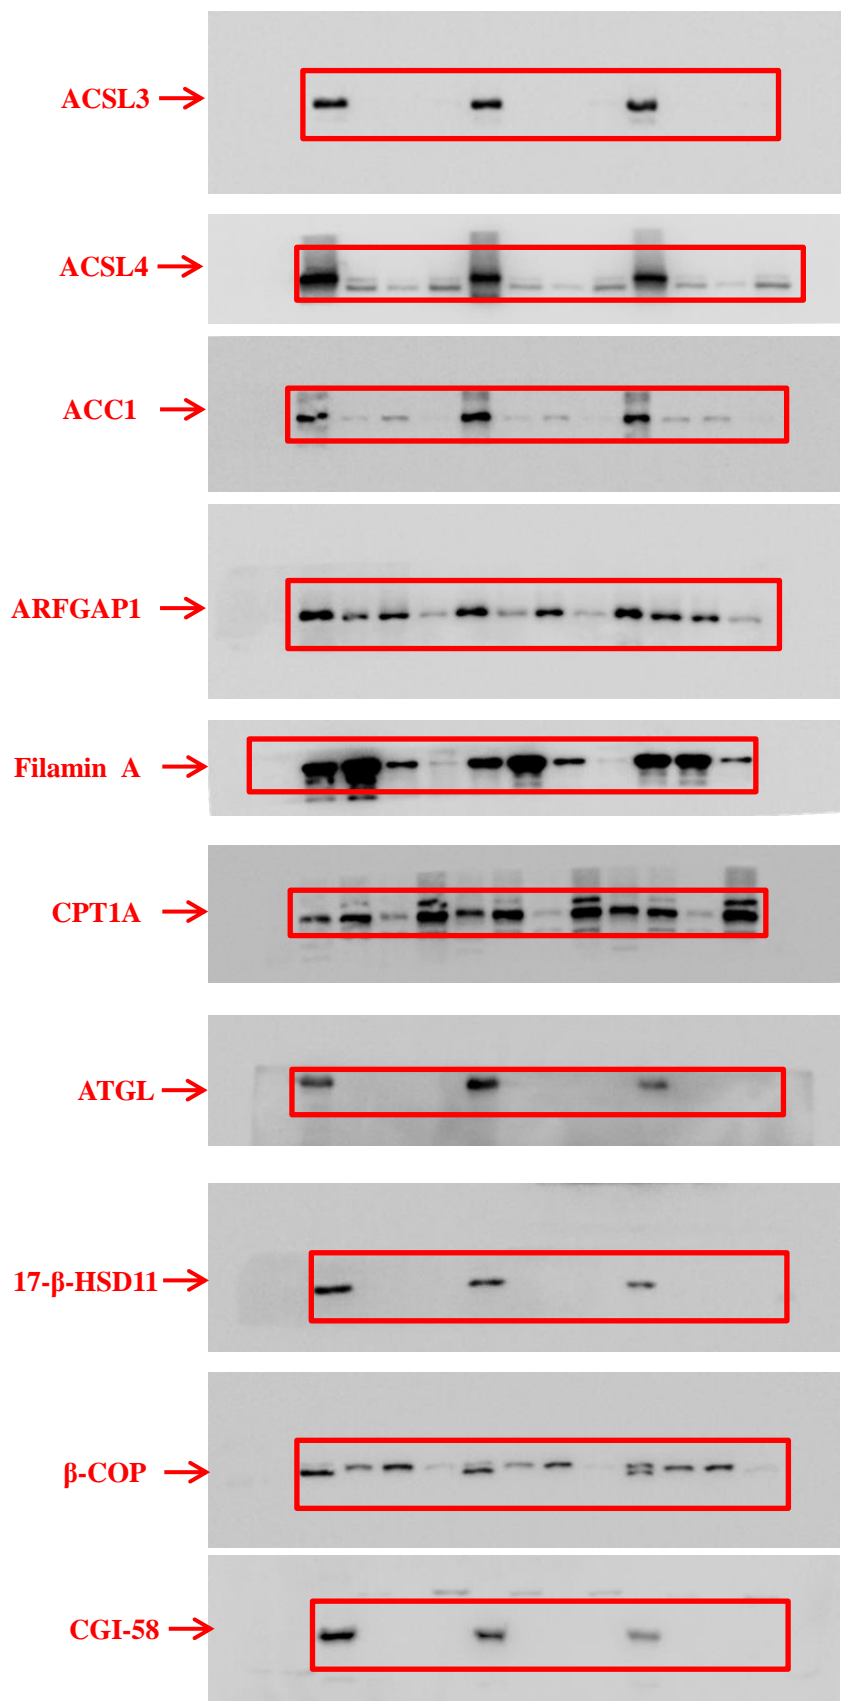

**Supplemental Table 1. Key reagents used in this study**

| REAGENT or RESOURCE                        | SOURCE                       | IDENTIFIER |
|--------------------------------------------|------------------------------|------------|
| Antibodies (Dilution)                      |                              |            |
| PLIN2 (1:2000 for WB)                      | abcam, UK Limited            | ab108323   |
| PLIN3 (1:5000 for WB 1:200 for IF)         | abcam, UK Limited            | ab138593   |
| $\alpha$ -SMA (1:1000 for WB 1:200 for IF) | abcam, UK Limited            | ab5694     |
| Fibronectin (1:1000 for WB)                | abcam, UK Limited            | ab2413     |
| collagen I $\alpha$ 1 (1:500 for WB)       | RayBiotech, USA              | P02452     |
| GAPDH (1:2000 for WB)                      | Millipore, Bedford, MA, USA  | CB1001     |
| ATG2A (1:500 for WB 1:200 for IF)          | MBL Life Science, Japan      | PD041      |
| HSP90 (1:1000 for WB)                      | abcam, UK Limited            | ab13492    |
| MFGE8 (1:1000 for WB)                      | ABclonal Biotechnology, USA  | A12322     |
| Rab18 (1:1000 for WB)                      | Millipore, Bedford, MA, USA  | 552126     |
| p62 (1:1000 for WB)                        | BD Transduction Laboratories | 610833     |
| LC3 (1:500 for WB)                         | Proteintech, USA             | 12135-1-AP |
| ACSL3 (1:1000 for WB)                      | Proteintech, USA             | 20710-1-AP |
| ACSL4 (1:1000 for WB)                      | ABclonal Biotechnology, USA  | A6826      |
| ACC1 (1:1000 for WB)                       | Upstate Biotechnology, USA   | 04-322     |
| ARFGAP1 (1:1000 for WB)                    | ABclonal Biotechnology, USA  | A7118      |
| Filamin A (1:1000 for WB)                  | Bioworld Technology, USA     | BS1128     |
| CPT1A (1:1000 for WB)                      | Bioworld Technology, USA     | BS7744     |
| ATGL (1:1000 for WB)                       | Cell signaling, MA, USA      | 2138       |
| 17- $\beta$ -HSD11 (1:1000 for WB)         | abcam, UK Limited            | ab136109   |
| $\beta$ -COP (1:1000 for WB)               | ABclonal Biotechnology, USA  | A10485     |
| CGI-58 (1:1000 for WB)                     | ABclonal Biotechnology, USA  | A7592      |
| Tim23 (1:1000 for WB)                      | BD Transduction Laboratories | 611223     |
| Caveolin-1 (1:1000 for WB)                 | BD Transduction Laboratories | 610060     |
| DDOST (1:1000 for WB)                      | abcam, UK Limited            | ab65533    |
| $\beta$ -Tubulin (1:2000 for WB)           | Cell signaling, MA, USA      | 2146       |
| Chemicals and Critical Commercial Assays   |                              |            |
| Retinol                                    | SIGMA                        | 17772      |
| Oleic acid                                 | SIGMA                        | O1008      |
| TRIzol Reagent                             | Invitrogen                   | T9424      |
| Reverse Transcriptase                      | Invitrogen                   | 18080-051  |
| LipidTOX Red                               | Thermo Scientific            | H34476     |
| DAPI                                       | SIGMA                        | D9542      |
| ECL                                        | PerkinElmer                  | 203-13261  |
| OptiPrep Density Gradient Medium           | SIGMA                        | D1556      |
| DNaseI                                     | SIGMA                        | AMPD1      |
| Pronase E                                  | SIGMA                        | P5147      |
| Collagenase IV                             | GIBCO                        | 17104019   |
| Experimental Models: Cell Lines            |                              |            |

|                                                                                                       |                             |        |
|-------------------------------------------------------------------------------------------------------|-----------------------------|--------|
| LX-2                                                                                                  | Millipore, Bedford, MA, USA | SCC064 |
| <b>Oligonucleotides</b>                                                                               |                             |        |
| human ATG2A siRNA<br>(sense: 5'-GCUACUUGCUGCACCACUATT-3',<br>antisense: 5'-UAGUGGUGCAGCAAGUAGCTT-3')  | GenePharma                  | N/A    |
| mouse ATG2A siRNA<br>(sense: 5'-GCCUCAUGCAUGACCACAATT-3',<br>antisense: 5'- UUGUGGUCAUGCAUGAGGCTT-3') | GenePharma                  | N/A    |

### Supplemental Table 2. Primers used in this study

| PRIMERS GENE<br>(HUMAN) | FORWARD SEQUENCE (5'→3')         | T <sub>m</sub> -Forward<br>primer | REVERSE SEQUENCE (5'→3')       | T <sub>m</sub> -Reverse<br>primer | Reference |
|-------------------------|----------------------------------|-----------------------------------|--------------------------------|-----------------------------------|-----------|
| FN1                     | GCACTACTGGCCAGTCTACAAC<br>CA     | 66                                | CGGGAATCTTCTCTGTCCAGC<br>CTGTA | 66                                | 1         |
| TGFB1                   | CAACGAAATCTATGACAAGTTC<br>AAGCAG | 65                                | CTTCTCGGAGCTCTGATGTG           | 55                                | 2         |
| COL3A1                  | CTCTGGGATTAATGGTAGT              | 51                                | CCAGGAGCTCCAGGAAT              | 52                                | 3         |
| COL1A1                  | AACCAAGGCTGCAACCTGGA             | 63                                | GGCTGAGTAGGGTACACGC<br>AGG     | 64                                | 4         |
| ACTA2                   | AGCGTGGCTATTCTTCGT               | 57                                | CTCATTTCAAAGTCCAGAG<br>CTACA   | 60                                | 5         |
| DGAT1                   | GCTTCAGCAACTACCGTGGCAT           | 57                                | CCTTCAGGAACAGAGAAAC<br>CACC    | 59                                |           |
| DGAT2                   | ATAAAGTGTTCGCTCCGGG              | 57                                | CGCGAGAGAAACAGCCTAG<br>A       | 57                                |           |
| ACACA                   | TTCACTCCACCTTGTGAGCGGA           | 65                                | GTCAGAGAAGCAGCCCATC<br>ACT     | 61                                | 6-8       |
| FASN                    | TTCTACGGCTCCACGCTCTTCC           | 66                                | GAAGAGTCTTCGTGAGCCA<br>GGA     | 61                                | 8         |
| SCD                     | GCAAAACCCAGCTGTCAA               | 55                                | GCCAGGTTTGTAGTACCTCC<br>T      | 58                                | 9         |
| ATGL                    | GTCAGACGGCGAGAATGTCA             | 57                                | GGGATGAGCCCACAGTACA<br>C       | 57                                |           |
| PNPLA3                  | AGCGGTCCAGCACTTAACTC             | 57                                | GGGCCACGAAACAGTCAGT<br>A       | 60                                |           |
| ACOT2                   | ATCTGGAGTACTTTGAAGAAGC<br>CAT    | 56                                | CCAACCTCTGGACCTTTTAC<br>CTCG   | 61                                |           |
| CPT1A                   | ATGTACGCCAAGATCGACCC             | 57                                | GACATGCAGTTGGCCGTTTC           | 57                                |           |
| HSL                     | AGCCTTCTGGAACATCACCGAG           | 60                                | TCGGCAGTCAGTGGCATCTC<br>AA     | 60                                |           |
| PPAR <sub>γ</sub>       | AGCCTGCGAAAGCCTTTGGTG            | 68                                | GGCTTCACATTCAGCAAACC           | 65                                | 10        |

|                |                        |    | TGG                          |    |                  |
|----------------|------------------------|----|------------------------------|----|------------------|
| CEBPA          | ACGATCAGTCCATCCCAGAG   | 57 | TTCACATTGCACAAGGCACT         | 57 | <sup>11,12</sup> |
| PPARA          | GGGATGCTGGTAGCGTATGG   | 60 | AAC TTCATGGCAAATCAA<br>ACTTG | 53 | <sup>13</sup>    |
| RETN           | CTAGCAAGACCCTGTGCTCC   | 60 | CTAAATATTAGGGAGCCGG<br>CGA   | 58 |                  |
| PGC-1 $\alpha$ | TTGAAAAGCTTGACTGGCGT   | 54 | AACCAGAGCAGCACACTCG<br>AT    | 58 |                  |
| CFD            | TGCTACAGCTGTCGGAGAAGG  | 60 | GCCACGTCGAGAGAGTTC           | 59 |                  |
| PLIN2          | GATGGCAGAGAACGGTGTGAAG | 62 | CAGGCATAGGTATTGGCAA<br>CTGC  | 64 |                  |
| PLIN3          | TTGCATCAGCCAGCGAATACGC | 68 | CACCTTAGACGACACAAGC<br>TCC   | 59 |                  |
| GAPDH          | TGTTGCCATCAATGACCCCTT  | 62 | CTCCACGACTACTCAGCG           | 57 | <sup>14</sup>    |

**Supplemental Table 3:** 496 LD proteins validated by quantitative proteomic analysis  
(Supplemental Table 3 was uploaded as “Supplementary Dataset” file)

**Supplemental Table 4: Up- and downregulated LD proteins**

| <b>Upregulated proteins</b> |                  |                                                                   |                |                |                 |
|-----------------------------|------------------|-------------------------------------------------------------------|----------------|----------------|-----------------|
| <b>GN</b>                   | <b>Accession</b> | <b>Description</b>                                                | <b>Control</b> | <b>Retinl</b>  | <b>OA</b>       |
| PRDX1                       | A0A0A0MRQ5       | Peroxiredoxin-1                                                   | 1.0024 ±0.0024 | 1.1928 ±0.0754 | 1.2744 ±0.0075  |
| WDR45                       | A0A0U1RQR1       | WD repeat domain phosphoinositide-interacting protein 4           | 1.0138 ±0.0138 | 1.2244 ±0.0281 | 2.7002 ±0.0657  |
| PCYT1A                      | C9J050           | Choline-phosphate cytidyltransferase A                            | 1.0306 ±0.0306 | 1.0767 ±0.0117 | 1.5693 ±0.0507  |
| SKP1                        | E5RJR5           | S-phase kinase-associated protein 1                               | 0.9348 ±0.0652 | 1.0889 ±0.0849 | 1.4325 ±0.0594  |
| RUVBL1                      | E7ETR0           | RuvB-like helicase                                                | 1.0099 ±0.0099 | 1.0349 ±0.025  | 1.1856 ±0.0091  |
| HTATIP2                     | E9PI87           | Oxidoreductase HTATIP2                                            | 0.9845 ±0.0155 | 1.2032 ±0.0744 | 1.3949 ±0.0645  |
| PSMC3                       | E9PM69           | 26S protease regulatory subunit 6A                                | 1.0186 ±0.0186 | 1.089 ±0.0149  | 1.165 ±0.031    |
| HSPB1                       | F8WE04           | Heat shock protein beta-1                                         | 0.9945 ±0.0055 | 1.1901 ±0.0329 | 1.1096 ±0.0197  |
| RPS20                       | G3XAN0           | 40S ribosomal protein S20                                         | 0.965 ±0.035   | 0.9965 ±0.0494 | 1.3931 ±0.041   |
| ATG2A                       | H7C3T2           | Autophagy-related protein 2 homolog A (Fragment)                  | 1.0572 ±0.0572 | 1.1385 ±0.0406 | 1.9855 ±0.065   |
| GPX4                        | K7ERP4           | Glutathione peroxidase (Fragment)                                 | 0.9512 ±0.0488 | 2.2308 ±0.0393 | 1.6464 ±0.0135  |
| RUVBL2                      | M0R0Y3           | RuvB-like 2                                                       | 0.9765 ±0.0235 | 1.0666 ±0.0121 | 1.2915 ±0.0686  |
| TPD52L2                     | O43399           | Tumor protein D54                                                 | 0.9508 ±0.0492 | 1.3839 ±0.221  | 3.774 ±0.0285   |
| OPA1                        | O60313           | Dynamin-like 120 kDa protein, mitochondrial                       | 1.1039 ±0.1039 | 1.1325 ±0.1377 | 2.4773 ±0.1879  |
| PLIN3                       | O60664           | Perilipin-3                                                       | 0.9586 ±0.0414 | 1.3121 ±0.3114 | 10.5375 ±0.8849 |
| TACC1                       | O75410-7         | Isoform 7 of Transforming acidic coiled-coil-containing protein 1 | 0.9883 ±0.0117 | 1.2925 ±0.0402 | 1.1768 ±0.0058  |
| APOL3                       | O95236-3         | Isoform 3 of Apolipoprotein L3                                    | 0.9965 ±0.0035 | 1.1501 ±0.1397 | 2.1518 ±0.045   |
| ENO1                        | P06733           | Alpha-enolase                                                     | 0.9769 ±0.0231 | 1.3436 ±0.0577 | 1.0279 ±0.0377  |
| HSP90AB1                    | P08238           | Heat shock protein HSP 90-beta                                    | 0.9542 ±0.0458 | 1.0336 ±0.0335 | 1.0225 ±0.0124  |
| RALB                        | P11234           | Ras-related protein Ral-B                                         | 1.0396 ±0.0396 | 1.1025 ±0.025  | 1.3606 ±0.0267  |
| PCNA                        | P12004           | Proliferating cell nuclear antigen                                | 0.9953 ±0.0047 | 1.0627 ±0.0249 | 1.2059 ±0.0053  |
| CCNB1                       | P14635-2         | Isoform 2 of G2/mitotic-specific cyclin-B1                        | 1.0516 ±0.0516 | 1.0863 ±0.0005 | 1.377 ±0.0641   |
| HMGA1                       | P17096-2         | Isoform HMG-Y of High mobility group protein HMG-I/HMG-Y          | 0.9344 ±0.0656 | 1.3114 ±0.0019 | 1.0241 ±0.0703  |
| LMNB1                       | P20700           | Lamin-B1                                                          | 0.9853 ±0.0147 | 1.321 ±0.0342  | 1.0589 ±0.0005  |
| MSN                         | P26038           | Moesin                                                            | 0.9809 ±0.0191 | 1.2403 ±0.0067 | 0.9846 ±0.0181  |
| PITPNB                      | P48739           | Phosphatidylinositol transfer                                     | 0.9738 ±0.0262 | 1.0282 ±0.0027 | 1.3292 ±0.0367  |



|            |          |                                                                             |                |                |                |
|------------|----------|-----------------------------------------------------------------------------|----------------|----------------|----------------|
|            |          | protein beta isoform                                                        |                |                |                |
| RAB9A      | P51151   | Ras-related protein Rab-9A                                                  | 1.0865 ±0.0865 | 1.0893 ±0.0502 | 1.7128 ±0.0636 |
| RAB27A     | P51159-2 | Isoform Short of Ras-related protein Rab-27A                                | 1.0675 ±0.0675 | 1.0966 ±0.1007 | 1.7726 ±0.0799 |
| UBE2G2     | P60604-2 | Isoform 2 of Ubiquitin-conjugating enzyme E2 G2                             | 0.9947 ±0.0053 | 1.0585 ±0.0297 | 1.1542 ±0.013  |
| S100A10    | P60903   | Protein S100-A10                                                            | 1.0324 ±0.0324 | 1.1498 ±0.0007 | 1.1925 ±0.0084 |
| RAB10      | P61026   | Ras-related protein Rab-10                                                  | 1.1145 ±0.1145 | 1.1322 ±0.1829 | 1.9028 ±0.0799 |
| CALM1      | P62158   | Calmodulin                                                                  | 0.9364 ±0.0636 | 1.1533 ±0.0032 | 1.2076 ±0.0098 |
| GNB2       | P62879   | Guanine nucleotide-binding protein G(I)/G(S)/G(T) subunit beta-2            | 0.996 ±0.004   | 1.0269 ±0.026  | 1.317 ±0.0195  |
| RAC1       | P63000   | Ras-related C3 botulinum toxin substrate 1                                  | 1.0448 ±0.0448 | 1.0861 ±0.0741 | 1.4881 ±0.0457 |
| BASP1      | P80723   | Brain acid soluble protein 1                                                | 0.9505 ±0.0495 | 1.2537 ±0.0417 | 1.2204 ±0.0041 |
| RHOG       | P84095   | Rho-related GTP-binding protein RhoG                                        | 1.0355 ±0.0355 | 1.0894 ±0.0309 | 1.3981 ±0.049  |
| LMNB2      | Q03252   | Lamin-B2                                                                    | 0.9795 ±0.0205 | 1.5179 ±0.146  | 1.5549 ±0.0556 |
| AHNAK      | Q09666   | Neuroblast differentiation-associated protein AHNAK                         | 0.9855 ±0.0145 | 1.1604 ±0.0282 | 1.0185 ±0.0006 |
| TPRG1L     | Q5T0D9   | Tumor protein p63-regulated gene 1-like protein                             | 1.0047 ±0.0047 | 1.0261 ±0.0215 | 1.5152 ±0.022  |
| IKBIP      | Q70UQ0-4 | Isoform 4 of Inhibitor of nuclear factor kappa-B kinase-interacting protein | 1.0037 ±0.0037 | 1.0705 ±0.0795 | 1.4928 ±0.0209 |
| HIST2H2A B | Q8IUE6   | Histone H2A type 2-B                                                        | 0.962 ±0.038   | 1.5716 ±0.0104 | 1.0099 ±0.0343 |
| SPG20      | Q8N0X7   | Spartin                                                                     | 0.9652 ±0.0348 | 1.2406 ±0.0376 | 1.1587 ±0.0251 |
| FAM177A1   | Q8N128   | Protein FAM177A1                                                            | 0.9888 ±0.0112 | 1.0822 ±0.0352 | 1.3005 ±0.0354 |
| UFD1L      | Q92890   | Ubiquitin fusion degradation protein 1 homolog                              | 0.9991 ±0.0009 | 1.2397 ±0.2447 | 1.0987 ±0.0417 |
| CHMP6      | Q96FZ7   | Charged multivesicular body protein 6                                       | 0.9729 ±0.0271 | 1.1074 ±0.02   | 1.451 ±0.0238  |
| VPS13A     | Q96RL7-4 | Isoform 4 of Vacuolar protein sorting-associated protein 13A                | 0.9866 ±0.0134 | 1.0373 ±0.0219 | 1.4773 ±0.0295 |
| DESI2      | Q9BSY9-2 | Isoform 2 of Desumoylating isopeptidase 2                                   | 1.0837 ±0.0837 | 1.1847 ±0.1128 | 2.2161 ±0.0195 |
| TRIM4      | Q9C037-2 | Isoform Beta of E3 ubiquitin-protein ligase TRIM4                           | 0.9906 ±0.0094 | 1.1392 ±0.0711 | 1.6815 ±0.033  |
| NDE1       | Q9NXR1-2 | Isoform 2 of Nuclear distribution protein nudE                              | 0.9954 ±0.0046 | 1.3584 ±0.0377 | 1.5441 ±0.0286 |

|       |        |                            |              |                |                |
|-------|--------|----------------------------|--------------|----------------|----------------|
|       |        | homolog 1                  |              |                |                |
| RAB21 | Q9UL25 | Ras-related protein Rab-21 | 1.071 ±0.071 | 1.0972 ±0.1173 | 1.8702 ±0.0608 |

### Down-regulated proteins

| GN       | Accession  | Description                                                                                 | Control        | Retinol        | OA             |
|----------|------------|---------------------------------------------------------------------------------------------|----------------|----------------|----------------|
| HYOU1    | A0A087X054 | Hypoxia up-regulated protein 1                                                              | 1.0054 ±0.0054 | 0.9778 ±0.0115 | 0.951 ±0.0074  |
| NAMPT    | A0A0C4D58  | Nicotinamide phosphoribosyltransferase                                                      | 1.0248 ±0.0248 | 0.9979 ±0.0718 | 0.6545 ±0.0011 |
| PTPN1    | B4DSN5     | Tyrosine-protein phosphatase non-receptor type                                              | 1.0134 ±0.0134 | 0.9139 ±0.0065 | 0.8728 ±0.0125 |
| HSD17B11 | D6RCD0     | Estradiol 17-beta-dehydrogenase 11                                                          | 0.9396 ±0.0604 | 0.896 ±0.0779  | 0.8729 ±0.0726 |
| RPLP0    | F8VU65     | 60S acidic ribosomal protein P0 (Fragment)                                                  | 0.988 ±0.012   | 0.8928 ±0.0156 | 0.8356 ±0.0225 |
| ERH      | G3V279     | Enhancer of rudimentary homolog                                                             | 1.0183 ±0.0183 | 0.996 ±0.011   | 0.8672 ±0.0217 |
| PGRMC1   | O00264     | Membrane-associated progesterone receptor component 1                                       | 1.0259 ±0.0259 | 0.8788 ±0.0231 | 0.9352 ±0.0031 |
| S100A9   | P06702     | Protein S100-A9                                                                             | 0.966 ±0.034   | 0.6922 ±0.0432 | 0.6275 ±0.0462 |
| TUBB     | P07437     | Tubulin beta chain                                                                          | 0.9736 ±0.0264 | 0.9118 ±0.005  | 0.7 ±0.0003    |
| EEF2     | P13639     | Elongation factor 2                                                                         | 0.9982 ±0.0018 | 0.8922 ±0.0216 | 0.9675 ±0.0076 |
| PKM      | P14618     | Pyruvate kinase PKM                                                                         | 0.9828 ±0.0172 | 0.9631 ±0.0164 | 0.8902 ±0.003  |
| ATP2A2   | P16615-2   | Isoform 2 of Sarcoplasmic/endoplasmic reticulum calcium ATPase 2                            | 1.0708 ±0.0708 | 0.7096 ±0.0285 | 1.0224 ±0.0336 |
| CANX     | P27824     | Calnexin                                                                                    | 1.0425 ±0.0425 | 0.6904 ±0.0094 | 0.9446 ±0.0434 |
| MYH9     | P35579     | Myosin-9                                                                                    | 0.9998 ±0.0002 | 0.953 ±0.0077  | 0.8635 ±0.0375 |
| DDOST    | P39656-2   | Isoform 2 of Dolichyl-diphosphooligosaccharide--p rotein glycosyltransferase 48 kDa subunit | 0.981 ±0.019   | 0.7553 ±0.0104 | 0.8776 ±0.0095 |
| RPL5     | P46777     | 60S ribosomal protein L5                                                                    | 0.9739 ±0.0261 | 0.9438 ±0.0033 | 0.8616 ±0.0013 |
| BCAP31   | P51572     | B-cell receptor-associated protein 31                                                       | 1.0673 ±0.0673 | 0.692 ±0.0387  | 0.9681 ±0.0173 |
| EEF1A1   | P68104     | Elongation factor 1-alpha 1                                                                 | 0.9897 ±0.0103 | 0.9305 ±0.0312 | 0.5858 ±0.0195 |
| TUBA1B   | P68363     | Tubulin alpha-1B chain                                                                      | 1.0035 ±0.0035 | 0.8295 ±0.0461 | 0.5069 ±0.0328 |
| MFGE8    | Q08431-2   | Lactadherin                                                                                 | 0.8 ±0.2       | 0.4 ±0.1       | 0.15 ±0.05     |
| FLNC     | Q14315-2   | Isoform 2 of Filamin-C                                                                      | 0.9896 ±0.0104 | 0.9733 ±0.0068 | 0.9137 ±0.0012 |
| PCBP2    | Q15366-6   | Isoform 6 of Poly(rC)-binding protein 2                                                     | 1.0239 ±0.0239 | 0.7453 ±0.0355 | 0.7216 ±0.0512 |
| ATL3     | Q6DD88     | Atlastin-3                                                                                  | 1.0597 ±0.0597 | 0.7506 ±0.0259 | 1.0173 ±0.0025 |
| TUBA1A   | Q71U36-2   | Isoform 2 of Tubulin alpha-1A chain                                                         | 0.9867 ±0.0133 | 0.9604 ±0.0209 | 0.7836 ±0.0178 |
| NPLOC4   | Q8TAT6     | Nuclear protein localization protein 4 homolog                                              | 0.9784 ±0.0216 | 0.9538 ±0.0054 | 0.6037 ±0.0035 |
| KIF16B   | Q96L93-6   | Isoform 5 of Kinesin-like protein                                                           | 1.0329 ±0.0329 | 0.7482 ±0.0282 | 0.7717 ±0.0037 |

| KIF16B |        |                            |               |               |               |
|--------|--------|----------------------------|---------------|---------------|---------------|
| TUBB6  | Q9BUF5 | Tubulin beta-6 chain       | 0.9844±0.0156 | 0.9598±0.0059 | 0.7644±0.0374 |
| RAB18  | Q9NP72 | Ras-related protein Rab-18 | 1±0           | 0.7727±0.1364 | 0.2273±0.0455 |

- 1 Chen, L. *et al.* Snail Driving Alternative Splicing of CD44 by ESRP1 Enhances Invasion and Migration in Epithelial Ovarian Cancer. *Cellular physiology and biochemistry : international journal of experimental cellular physiology, biochemistry, and pharmacology* **43**, 2489-2504, doi:10.1159/000484458 (2017).
- 2 Barth, K. A., Waterfield, J. D. & Brunette, D. M. The effect of surface roughness on RAW 264.7 macrophage phenotype. *Journal of biomedical materials research. Part A* **101**, 2679-2688, doi:10.1002/jbm.a.34562 (2013).
- 3 Tarzeman, R., Jiang, G., Jiang, J. X., Larjava, H. & Hakkinen, L. Connexin 43 Hemichannels Regulate the Expression of Wound Healing-Associated Genes in Human Gingival Fibroblasts. *Sci Rep* **7**, 14157, doi:10.1038/s41598-017-12672-1 (2017).
- 4 Intriago, B. & Fernanda, M. Regulation of gingival fibroblast gene expression by leukocyte and platelet rich fibrin. *University of British Columbia* (2017).
- 5 Khodyuchenko, T. *et al.* Congenital heart defects are rarely caused by mutations in cardiac and smooth muscle actin genes. *BioMed research international* **2015**, 127807, doi:10.1155/2015/127807 (2015).
- 6 Li, C. P., Li, H. J., Nie, J., Chen, X. & Zhou, X. Mutation of miR-21 targets endogenous lipoprotein receptor-related protein 6 and nonalcoholic fatty liver disease. *Am J Transl Res* **9**, 715-721 (2017).
- 7 Go, G. W. *et al.* t10,c12 conjugated linoleic acid upregulates hepatic de novo lipogenesis and triglyceride synthesis via mTOR pathway activation. *Journal of microbiology and biotechnology* **23**, 1569-1576 (2013).
- 8 Go, G. W. *et al.* The combined hyperlipidemia caused by impaired Wnt-LRP6 signaling is reversed by Wnt3a rescue. *Cell metabolism* **19**, 209-220, doi:10.1016/j.cmet.2013.11.023 (2014).
- 9 Shih, C. & Huang, J.-Y. Treating hepatitis virus infection by modulating micrnas mir-130a, mir-130b, mir-204, or mir-1236. *Academia Sinica* (2016).
- 10 Ouyang, H. *et al.* WNT7A and PAX6 define corneal epithelium homeostasis and pathogenesis. *Nature* **511**, 358-361, doi:10.1038/nature13465 (2014).
- 11 Scaffidi, P. & Misteli, T. Lamin A-dependent misregulation of adult stem cells associated with accelerated ageing. *Nat Cell Biol* **10**, 452-459, doi:10.1038/ncb1708 (2008).
- 12 Yin, S., Luan, J., Fu, S., Wang, Q. & Zhuang, Q. Does Water-Jet Force Make a Difference in Fat Grafting? In Vitro and In Vivo Evidence of Improved Lipoaspirate Viability and Fat Graft Survival. *Plastic and Reconstructive Surgery* **135**, 127-138, doi:10.1097/prs.0000000000000780 (2015).
- 13 Hiramitsu, M. *et al.* Eriocitrin ameliorates diet-induced hepatic steatosis with activation of mitochondrial biogenesis. *Sci Rep* **4**, 3708, doi:10.1038/srep03708 (2014).
- 14 Tangchitphisut, P. *et al.* Infrapatellar Fat Pad: An Alternative Source of Adipose-Derived Mesenchymal Stem Cells. *Arthritis* **2016**, 4019873, doi:10.1155/2016/4019873 (2016).
